# Supplementary material for: Improvement on the selectivity and sorption capacity of cadmium by iron loaded carbon nanotubes with detection by electrothermal atomic absorption spectrometry
Source: Royal Society of Chemistry journal article supplement (doi:10.1039/c2ja30099k), 2012-01-01
Supplement: c2ja30099k.pdf [file c2ja30099k.pdf]

## Supporting Information

### **Improvement on the selectivity and sorption capacity of cadmium by iron loaded carbon nanotubes with detection by electrothermal atomic absorption spectrometry**

Xiaoxing Zhang, Lipei Zhang, Ting Yang, Liming Shen, Mingli Chen\*, Jianhua Wang\*  
Research Center for Analytical Sciences, Northeastern University, Box 332,  
Shenyang 110819, China

[chenml@mail.neu.edu.cn](mailto:chenml@mail.neu.edu.cn) (M.-L. Chen), [jianhuajrz@mail.neu.edu.cn](mailto:jianhuajrz@mail.neu.edu.cn) (J.-H. Wang)

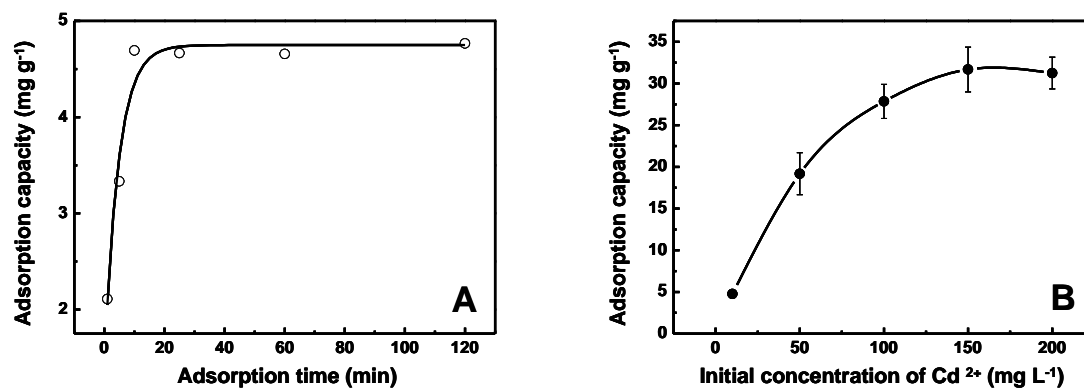

Fig. S1. The dependence of cadmium adsorption by NT-FP on the sorption time (A) and initial concentration of cadmium (B).

(A): Initial Cd<sup>2+</sup> concentration: 10 mg L<sup>-1</sup>, pH: 6, sample volume: 0.5 mL; amount of sorbent: 1.0 mg.

(B): Sample volume: 0.5 mL, pH: 6; sorption time: 120 min; amount of sorbent: 1.0 mg.

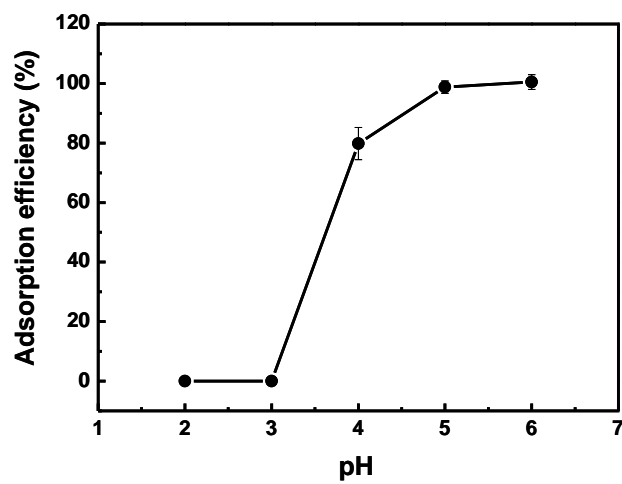

Fig. S2. pH dependence of the adsorption efficiency of cadmium onto the NT-FP mini-column.

Sample volume: 200  $\mu\text{L}$ , 2  $\mu\text{g L}^{-1}$   $\text{Cd}^{2+}$ ; sampling flowrate: 15  $\mu\text{L s}^{-1}$ .

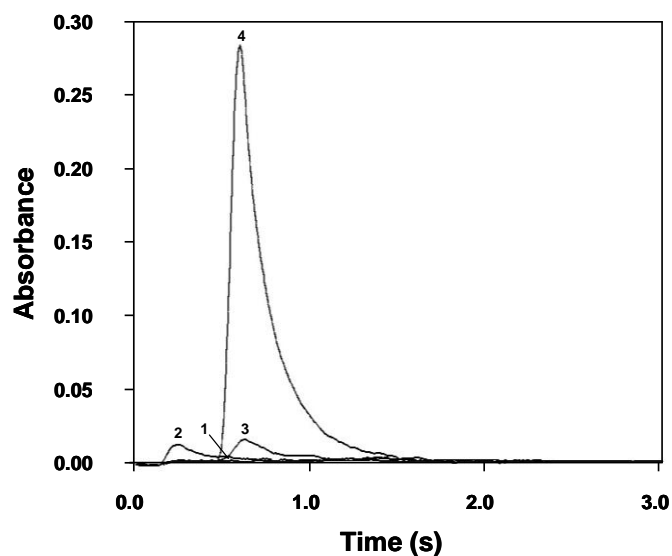

Fig. S3. The recorded ETAAS signals for cadmium before and after preconcentration on the NT-FP mini-column. (1) Blank; (2)  $0.1 \mu\text{g L}^{-1} \text{Cd}^{2+}$ ; (3) blank after preconcentration/elution; (4)  $0.1 \mu\text{g L}^{-1} \text{Cd}^{2+}$  undergoing preconcentration/elution process. Sample volume:  $1000 \mu\text{L}$ , pH 6; sampling flowrate:  $15 \mu\text{L s}^{-1}$ ; eluent:  $0.002 \text{ mol L}^{-1} \text{H}_3\text{PO}_4 + 0.1 \text{ mol L}^{-1} \text{NH}_4\text{NO}_3$ ,  $50 \mu\text{L}$ ; elution flowrate:  $10 \mu\text{L s}^{-1}$ .
